# Supplementary material for: [001]-Oriented heteroepitaxy for fabricating emissive surface mounted metal–organic frameworks
Source: Royal Society of Chemistry journal article supplement (doi:10.1039/d4tc00018h), 2024-01-01
Supplement: d4tc00018h1.pdf [file d4tc00018h1.pdf]

## Electronic Supplementary Information

### **[001]-Oriented Heteroepitaxy for Fabricating Emissive Surface Mounted Metal-Organic Frameworks**

Tonghan Zhao,<sup>\*a</sup> Narjes Taghizadeh Rahaghi,<sup>b</sup> Jan C. Fischer,<sup>a,c</sup> Bryce S. Richards,<sup>a,c</sup> and Ian A. Howard<sup>\*†a,c</sup>

<sup>a</sup> Institute of Microstructure Technology, Karlsruhe Institute of Technology, Hermann-von-Helmholtz-Platz 1, 76344 Eggenstein-Leopoldshafen, Germany. Email: tonghan.zhao@kit.edu; iahoward@gmail.com

<sup>b</sup> Institute of Solid State Physics, NAWI Graz, Graz University of Technology, Petersgasse 16, A-8010 Graz, Austria.

<sup>c</sup> Light Technology Institute, Karlsruhe Institute of Technology, Engesserstrasse 13, 76131 Karlsruhe, Germany.

† Present address: Carl Zeiss AG – Innovation Hub Karlsruhe, Hermann-von-Helmholtz-Platz 6, 76344 Eggenstein-Leopoldshafen

Supplementary Figures

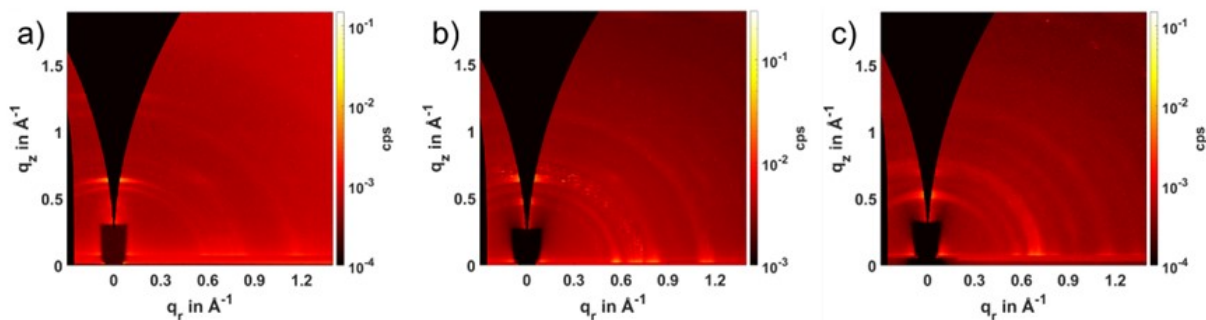

Fig. S1 2D GIWAXS pattern of  $(\text{Zn})_2(\text{BDC})_2(\text{DABCO})$  on (a)  $\text{TiO}_2@\text{Si}$ , (b)  $\text{Gd}_2\text{O}_3@\text{Si}$ , and (c) glass substrates.

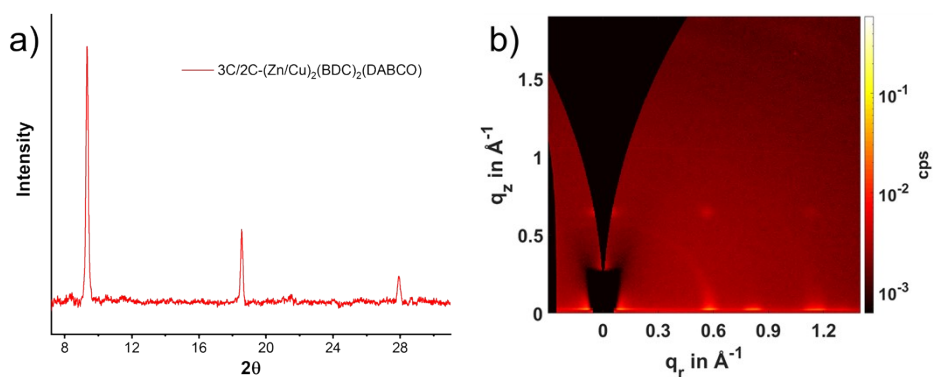

Fig. S2 (a) Out-of-plane XRD pattern and (b) 2D GIWAXS pattern of  $3\text{C}/2\text{C}-(\text{Zn}/\text{Cu})_2(\text{BDC})_2(\text{DABCO})$ .

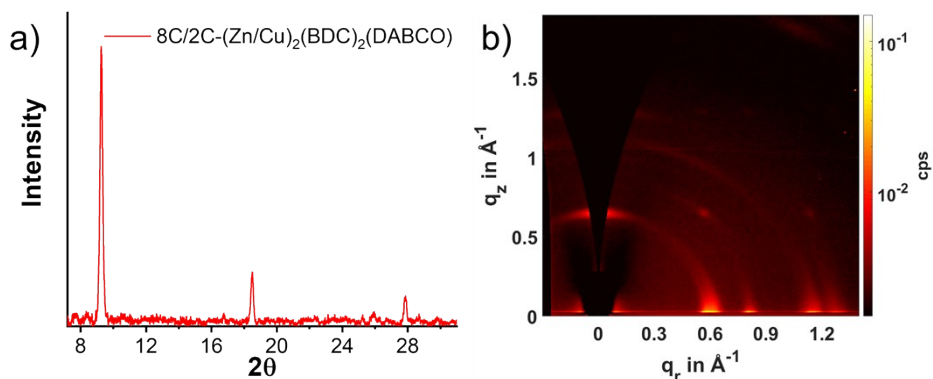

Fig. S3 (a) Out-of-plane XRD pattern and (b) 2D GIWAXS pattern of  $8\text{C}/2\text{C}-(\text{Zn}/\text{Cu})_2(\text{BDC})_2(\text{DABCO})$ .

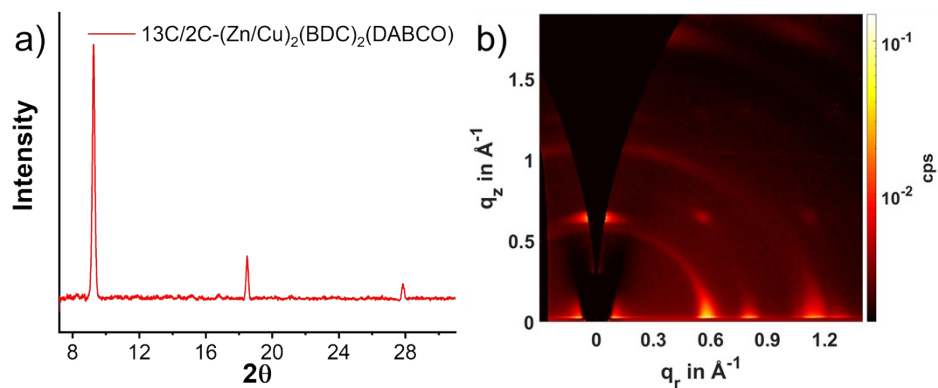

**Fig. S4** (a) Out-of-plane XRD pattern and (b) 2D GIWAXS pattern of 13C/2C-(Zn/Cu)<sub>2</sub>(BDC)<sub>2</sub>(DABCO).

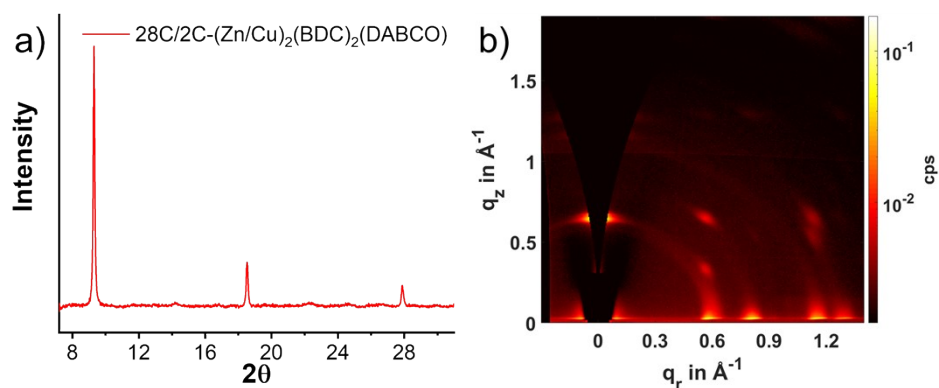

**Fig. S5** (a) Out-of-plane XRD pattern and (b) 2D GIWAXS pattern of 28C/2C-(Zn/Cu)<sub>2</sub>(BDC)<sub>2</sub>(DABCO).

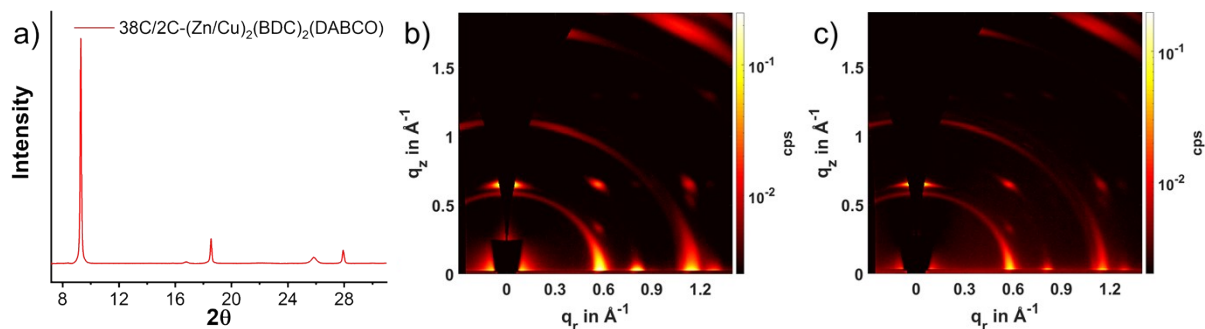

**Fig. S6** (a) Out-of-plane XRD pattern and (b and c) 2D GIWAXS pattern of 38C/2C-(Zn/Cu)<sub>2</sub>(BDC)<sub>2</sub>(DABCO) at (b)  $\alpha_i = 0.2^\circ$  and (c)  $\alpha_i = 0.05^\circ$ .

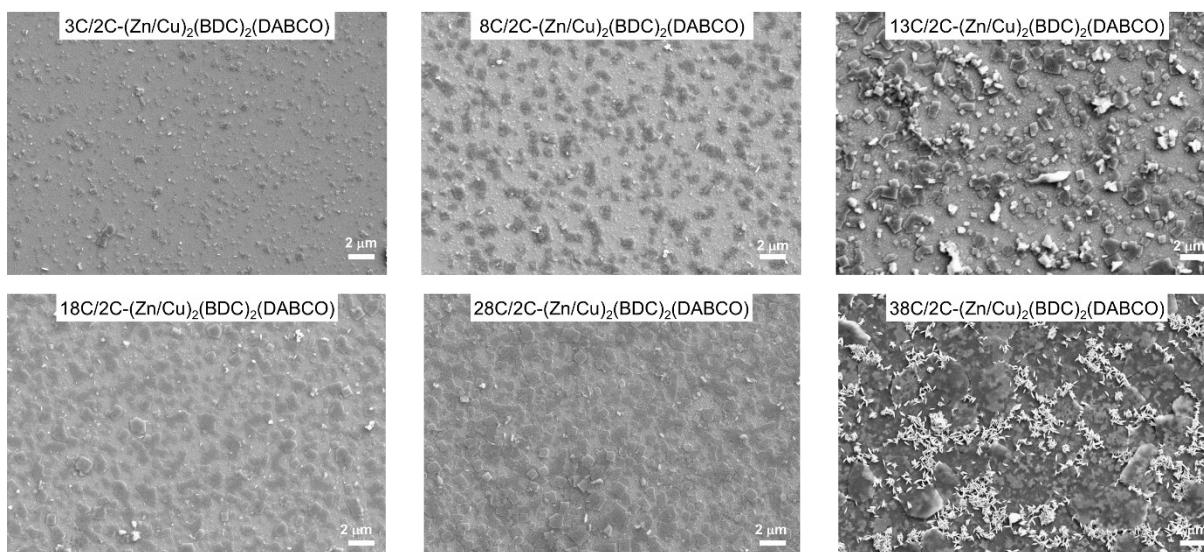

**Fig. S7** SEM images of Zn/Cu heterostructures with different growth cycles of  $\text{Zn}_2(\text{BDC})_2(\text{DABCO})$  on top of  $2\text{C-Cu}_2(\text{BDC})_2(\text{DABCO})$ .

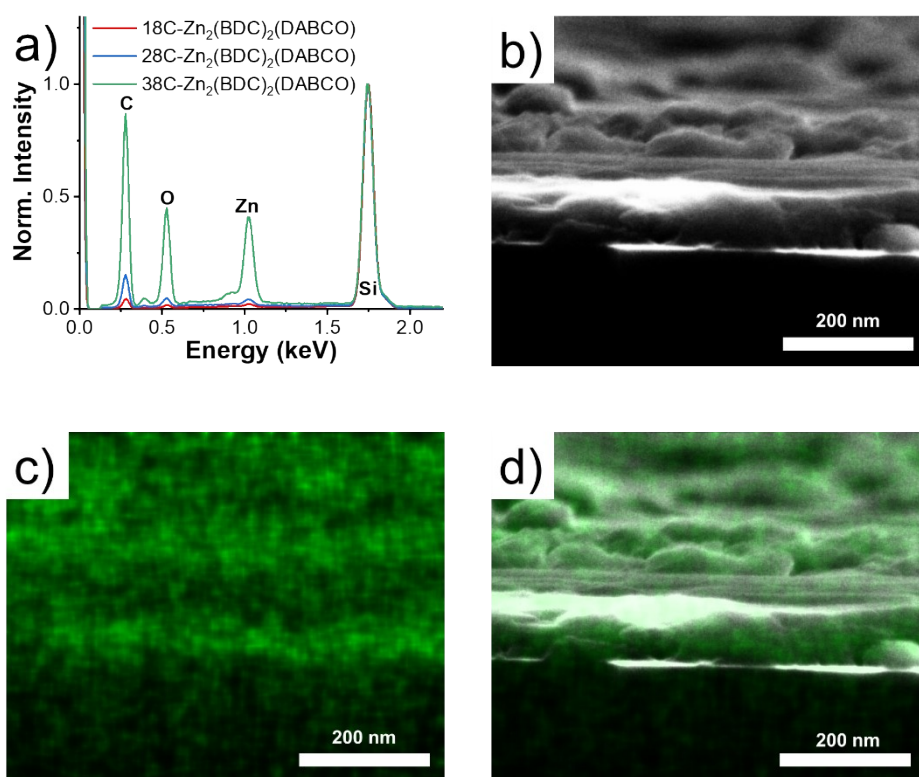

**Fig. S8** (a) Normalized EDX spectra of 18C-, 28C-, and 38C-  $\text{Zn}_2(\text{BDC})_2(\text{DABCO})$  on top of  $2\text{C-Cu}_2(\text{BDC})_2(\text{DABCO})$ . (b) Cross-section SEM image of 38C- $\text{Zn}_2(\text{BDC})_2(\text{DABCO})$  on top of  $2\text{C-Cu}_2(\text{BDC})_2(\text{DABCO})$ . (c) EDX mapping of Zn on the cross-section. (d) Emerged image of (b) and (c).

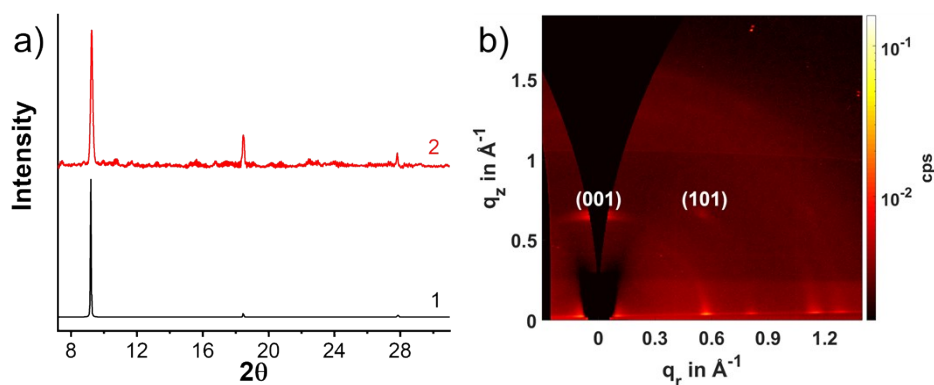

**Fig. S9** (a) Out-of-plane XRD pattern of 20C-Zn<sub>2</sub>(NDC)<sub>2</sub>(DABCO) on top of 2C-Cu<sub>2</sub>(BDC)<sub>2</sub>(DABCO) and simulated diffractogram of the Zn<sub>2</sub>(NDC)<sub>2</sub>(DABCO) with preferred orientation along the [001] direction as reference. (b) 2D GIWAXS pattern of 20C-Zn<sub>2</sub>(NDC)<sub>2</sub>(DABCO) on top of 2C-Cu<sub>2</sub>(BDC)<sub>2</sub>(DABCO).

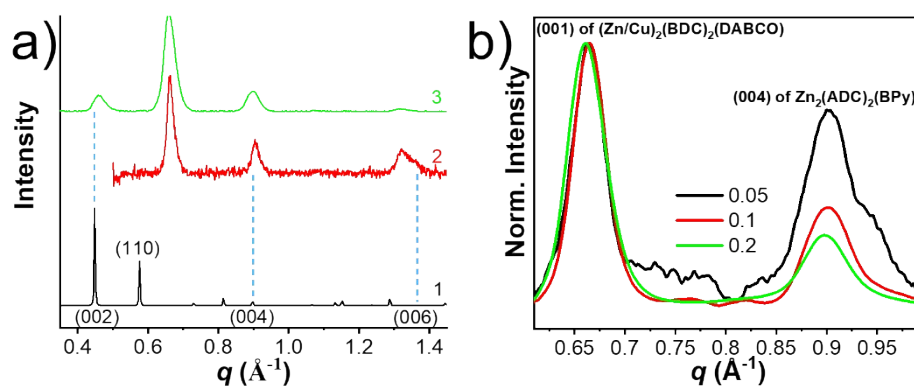

**Fig. S10** (a) Out-of-plane XRD pattern (2) and out-of-plane integration result from 2D GIWAXS pattern (3) of 20C-Zn<sub>2</sub>(ADC)<sub>2</sub>(BPy) on top of 3C/2C-(Zn/Cu)<sub>2</sub>(BDC)<sub>2</sub>(DABCO) and simulated diffractogram of the Zn<sub>2</sub>(ADC)<sub>2</sub>(BPy) (1) as reference. (b) GIWAXS out-of-plane plot of 20C-Zn<sub>2</sub>(ADC)<sub>2</sub>(BPy) on top of 3C/2C-(Zn/Cu)<sub>2</sub>(BDC)<sub>2</sub>(DABCO) probing at different incidence angles: 0.05°, 0.1°, and 0.2°.

**Table S1.** Photophysical parameters of Zn<sub>2</sub>(ADC)<sub>2</sub>(BPy) on 3C/2C-(Zn/Cu)<sub>2</sub>(BDC)<sub>2</sub>(DABCO), ADC film and ADC in ethanol ( $5 \times 10^{-7}$  mol L<sup>-1</sup>).

|                       | Zn <sub>2</sub> (ADC) <sub>2</sub> (BPy) on 3C/2C-(Zn/Cu) <sub>2</sub> (BDC) <sub>2</sub> (DABCO) |            | ADC film   | Solvated ADC |
|-----------------------|---------------------------------------------------------------------------------------------------|------------|------------|--------------|
| $\lambda_{em}^a$ [nm] | 426                                                                                               | 501        | 501        | 423          |
| $\tau_1$ [ns]         | 1.23 (54%)                                                                                        | 1.79 (52%) | 2.15 (52%) |              |
| $\tau_2$ [ns]         | 6.45 (46%)                                                                                        | 7.98 (48%) | 6.33 (48%) |              |
| $\tau^b$ [ns]         | 3.62                                                                                              | 4.78       | 4.18       | 7.11         |

<sup>a</sup>)Excitation with 365 nm;

<sup>b</sup>)Mono-exponential fit for ethanolic ADC solution. Bi-exponential fit for Zn<sub>2</sub>(ADC)<sub>2</sub>(BPy) on

3C/2C-(Zn/Cu)<sub>2</sub>(BDC)<sub>2</sub>(DABCO) and ADC film, and fluorescence lifetime calculated using the equation  $\tau = A_1\tau_1 + A_2\tau_2$ .
